# Supplementary material for: One-Step Synthesized Iron-Carbon Core-Shell Nanoparticles to Activate Persulfate for Effective Degradation of Tetrabromobisphenol A: Performance and Activation Mechanism
Source: MDPI journal article supplement (doi:10.3390/nano12244483), 2022-12-18
Supplement: s1 [file s1]

# One-Step Synthesized Iron-Carbon Core-Shell Nanoparticles to Activate Persulfate for Effective Degradation of Tetrabromobisphenol A: Performance and Activation Mechanism

Yunjiang Yu <sup>1</sup>, Chang Liu <sup>1,2</sup>, Chenyu Yang <sup>1</sup>, Yang Yu <sup>3</sup>, Lun Lu <sup>1</sup>, Ruixue Ma <sup>1</sup>, and Liangzhong Li <sup>1,\*</sup>

<sup>1</sup> State Environmental Protection Key Laboratory of Environmental Pollution Health Risk Assessment, Center for Environmental Health Research, South China Institute of Environmental Sciences, Ministry of Ecology and Environment, Guangzhou 510655, China

<sup>2</sup> Inner Mongolia Autonomous Region Key Laboratory of Water Pollution Control, School of Ecology and Environment, Inner Mongolia University, Hohhot 010021, China

<sup>3</sup> Guangdong Key Laboratory of Environmental Pollution and Health, School of Environment Jinan University, Guangzhou 511443, China

\* Correspondence: liliangzhong@scies.org

**Table S1.** The summaries of reported organic pollutants degradation conditions and performances by iron-based activated PS degradation system.

**Table S2.** The basic information of the actual contaminated water.

**Figure S1** SEM and TEM image of Fe@MC.

**Figure S2** Hysteresis curves of Fe@MC nanocore-shell catalysts.

**Figure S3** TGA of Fe@MC.

**Figure S4** Full XPS spectrum Fe@MC.

**Figure S5** The relative content of C, O, Fe analyzed by SEM-EDX.

**Figure S6** N<sub>2</sub> sorption isotherms and pore size distributions of Fe@MC.

**Figure S7** Comparison of the effect of Fe@MC/PS system and Fe@MC on removing TBBPA.

**Figure S8** Recyclability and regeneration of Fe@MC core-shell nanoparticles on the degradation of TBBPA.

**Figure S9** The removal of TBBPA by Fe@MC/PS in actual contaminated water(a) and TOC removal efficiency with different PS concentration (b).

**Figure S10** Electron density Laplacian analysis (a) and projection map of electron localization function ELF (b) of TBBPA.

**Figure S11** Corresponding mass spectra and proposed structure of degradation products of TBBPA.

**Table S1.** The summaries of reported organic pollutants degradation conditions and performances by iron-based activators.

| Catalyst                           | (g/L) | pollutant | (mg/L) | PS/PDS | pH  | Reaction Time (min) | Removal efficiency (%) | Reference |
|------------------------------------|-------|-----------|--------|--------|-----|---------------------|------------------------|-----------|
| Fe@MC                              | 0.2   | TBBPA     | 10     | 2.0    | 7.0 | 10                  | 94.9                   | This work |
| MCFe                               | 0.5   | 2,4,6-TCP | 100    | 2.0    | 3   | 180                 | 94.8                   | [1]       |
| Fe@CN                              | 0.1   | BPA       | 20     | 0.5    | 6.8 | 60                  | 96.0                   | [2]       |
| Fe/Co@mHS                          | 1     | TBBPA     | 10     | 20.0   | 5   | 6                   | 97.13                  | [3]       |
| AC@Fe <sub>3</sub> O <sub>4</sub>  | 0.4   | TC        | 10     | 40     | 3   | 180                 | 99.8                   | [4]       |
| FeO@Fe <sub>3</sub> O <sub>4</sub> | 0.5   | DPB       | 5      | 1.8    | 7   | 180                 | 94.7                   | [5]       |

**Table S2.** The basic information of the actual contaminated water.

| pH   | Electrical conductivity (ms·cm <sup>-1</sup> ) | COD (mg·L <sup>-1</sup> ) | TOC (mg·L <sup>-1</sup> ) | Turbidity (NTU) |
|------|------------------------------------------------|---------------------------|---------------------------|-----------------|
| 8.22 | 1.10                                           | 202.0                     | 160.1                     | 87              |

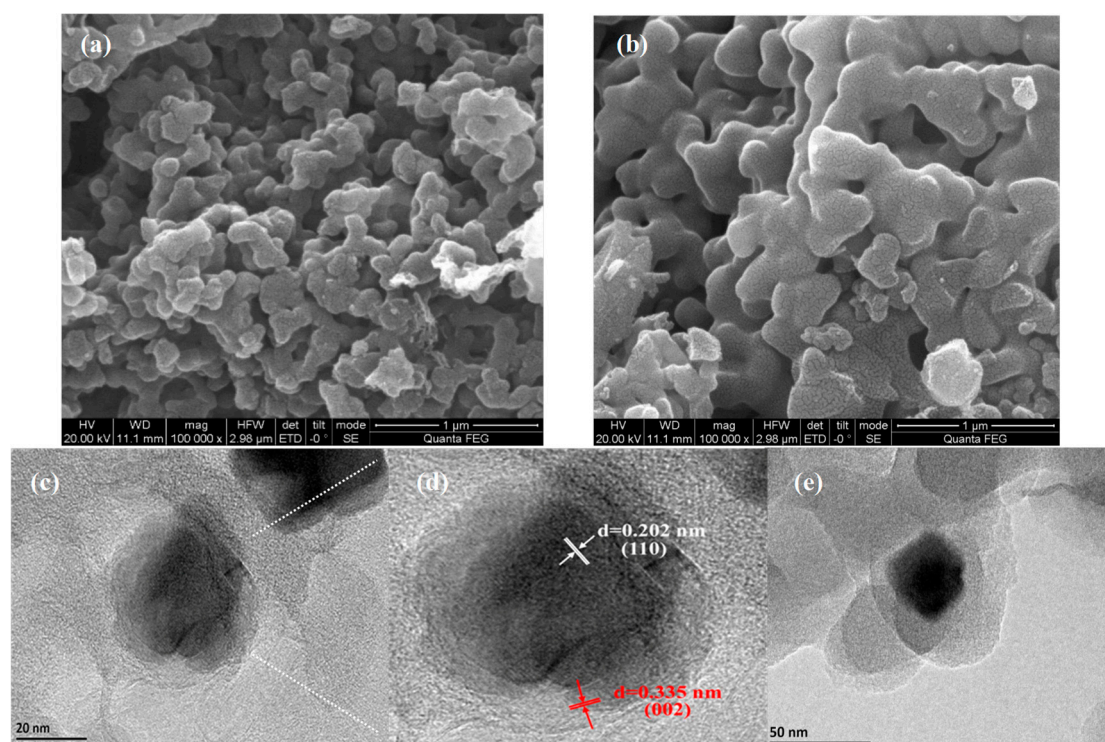**Figure S1.** SEM (a 800 °C, b 1200 °C) and TEM image of (b,c,d) Fe@MC.

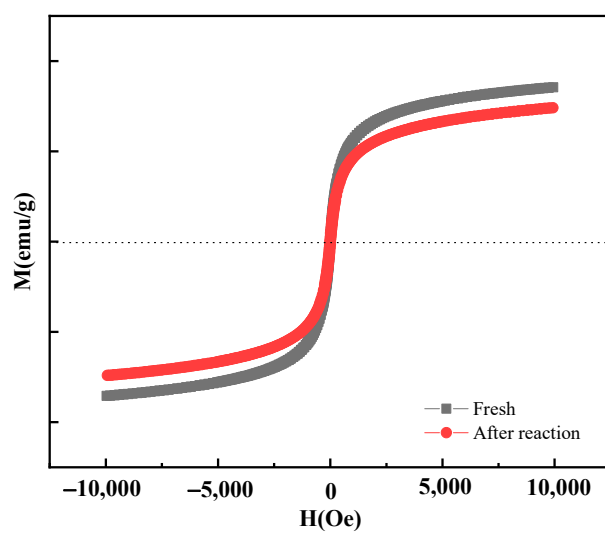

Figure S2. Hysteresis curve image of Fe@MC

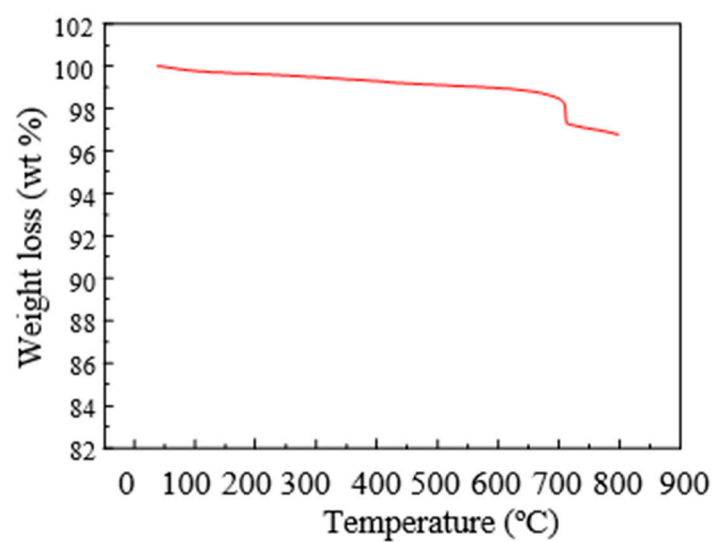

Figure S3. TGA of Fe@MC.

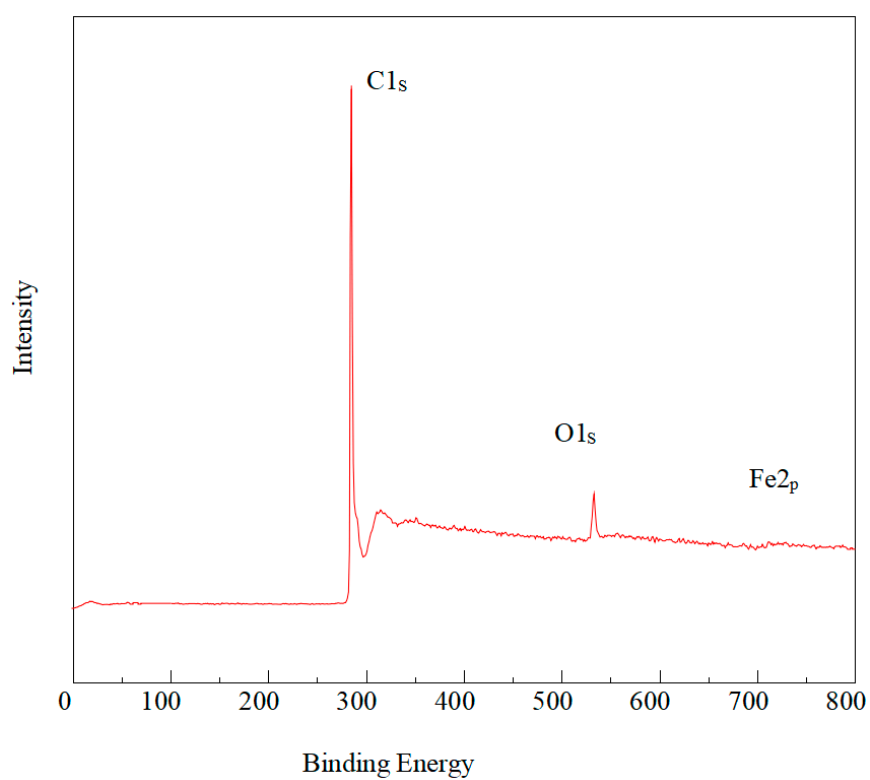

**Figure S4.** Full XPS spectrum Fe@MC .

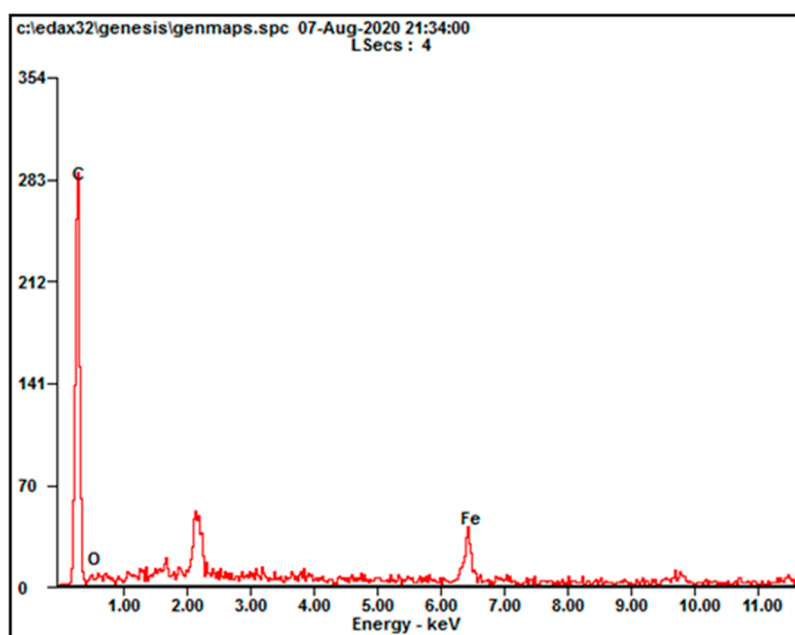

|                      | <i><b>Wt%</b></i> | <i><b>At%</b></i> |
|----------------------|-------------------|-------------------|
| <i><b>CK</b></i>     | 88.49             | 95.77             |
| <i><b>OK</b></i>     | 02.67             | 02.17             |
| <i><b>FeK</b></i>    | 08.84             | 02.06             |
| <i><b>Matrix</b></i> | Correction        | ZAF               |

**Figure S5.** The relative content of C, O, Fe analyzed by SEM-EDX.

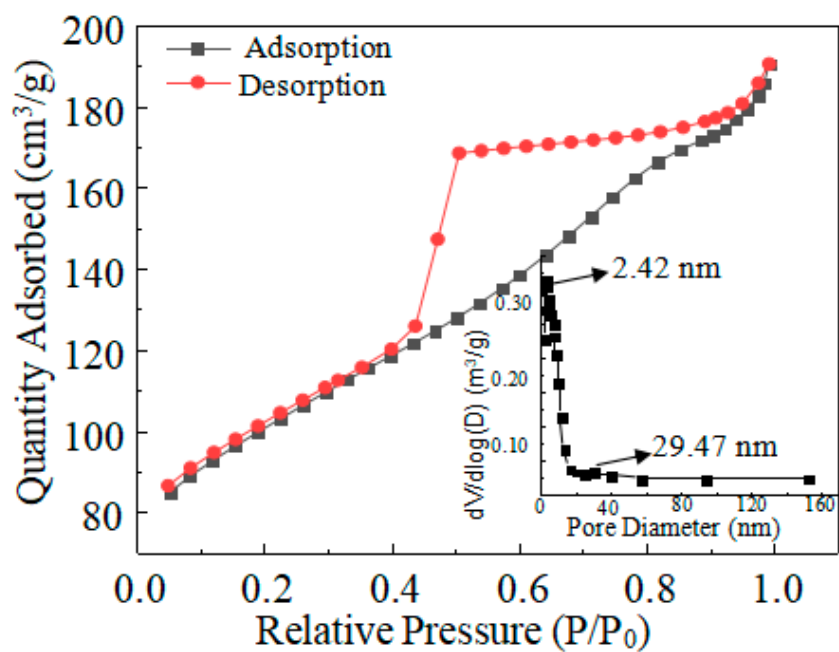

**Figure S6.** N<sub>2</sub> adsorption-desorption isotherms and pore size distributions of Fe@MC.

Figure S7.

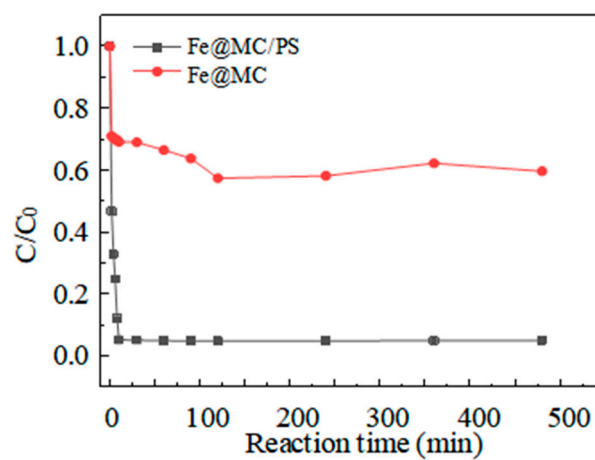

Figure S7. Effect of PS Addition on Removal of TBBPA

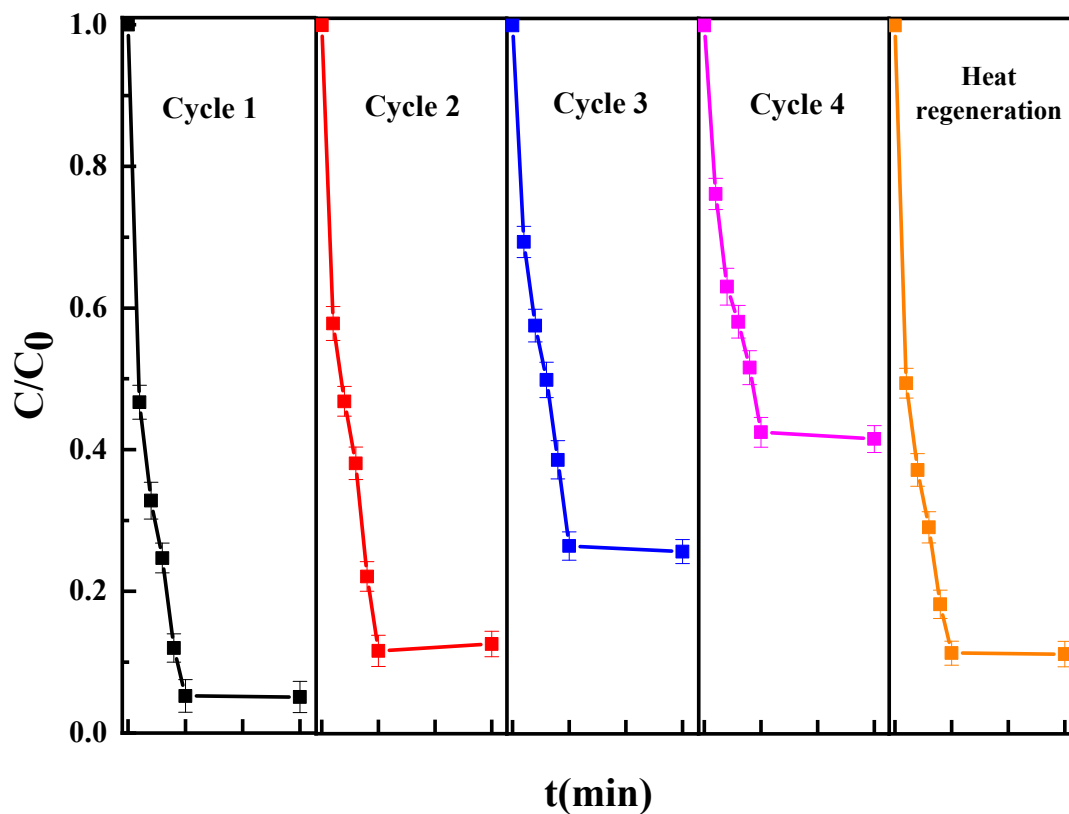

Figure S8. Recyclability and regeneration of Fe@MC

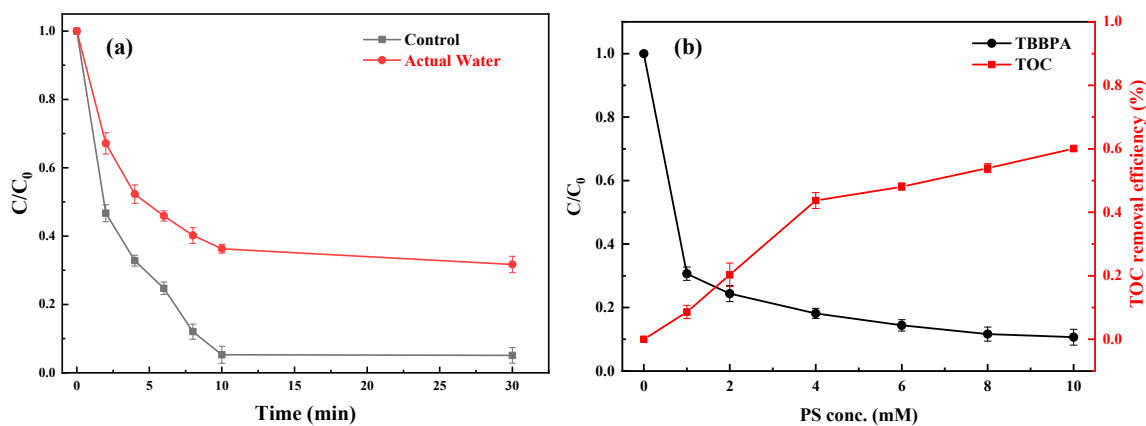

Figure S9. The removal of TBBPA by Fe@MC/PS in actual contaminated water(a) and TOC removal efficiency with different PS concentration (b).



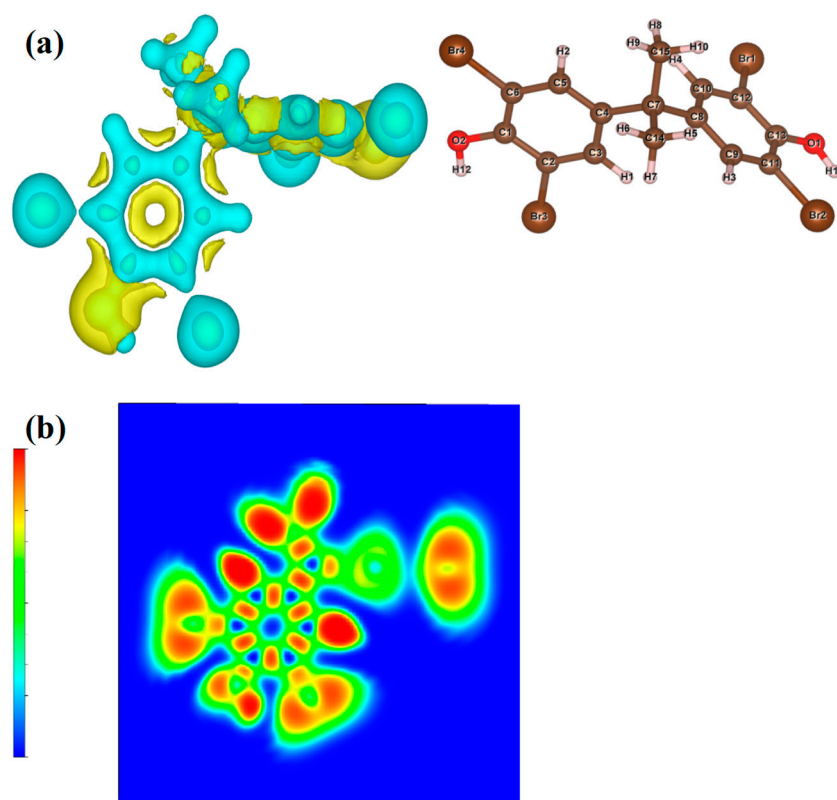

**Figure S10.** Electron density Laplacian analysis (a) and projection map of electron localization function ELF (b) of TBBPA.

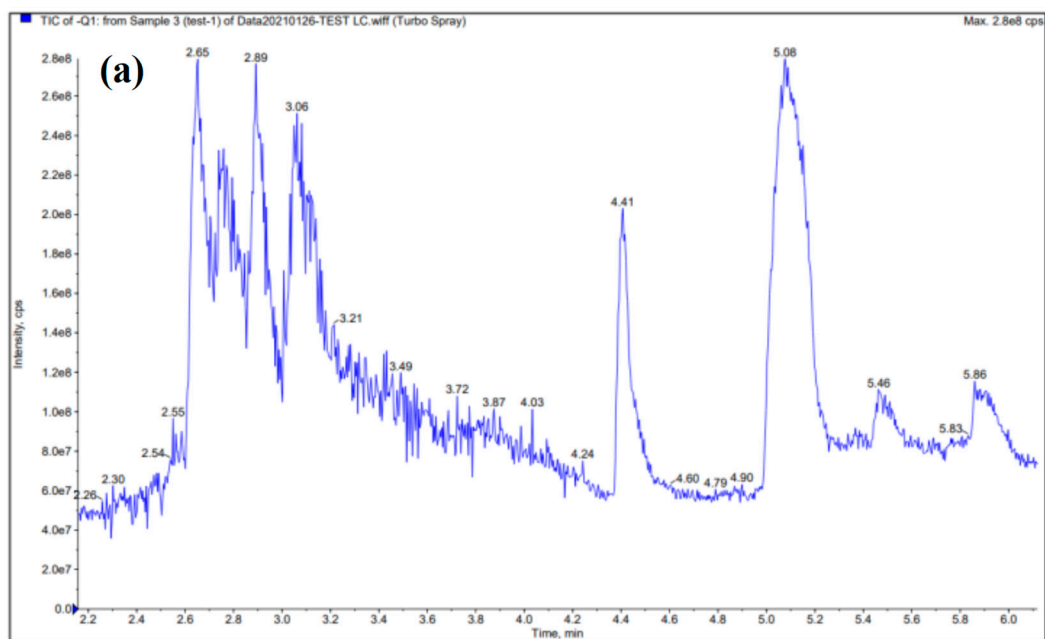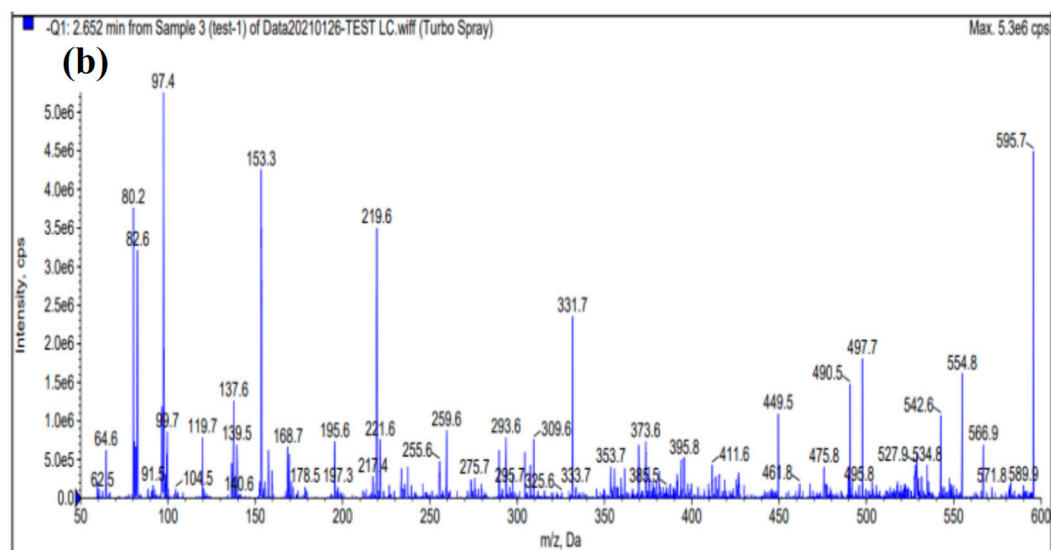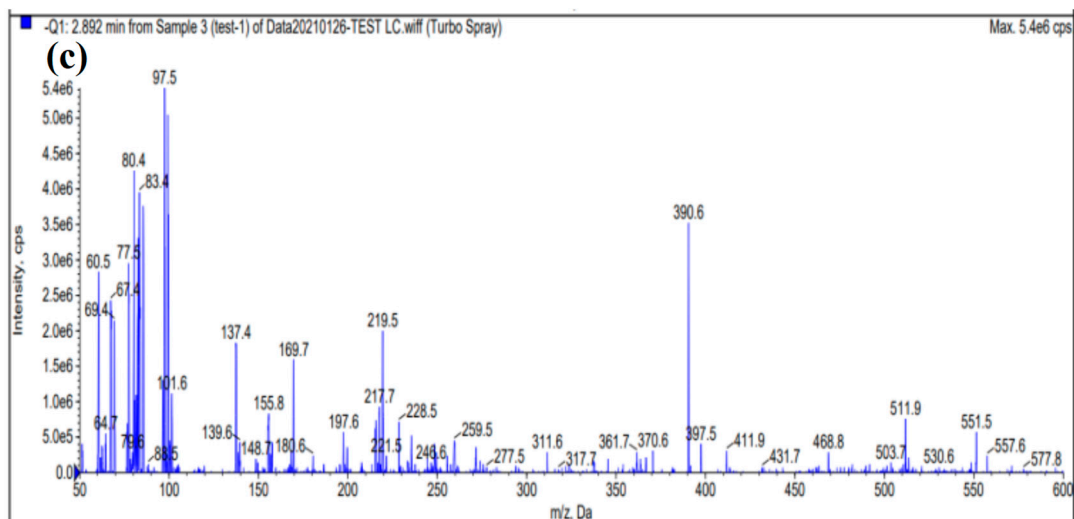

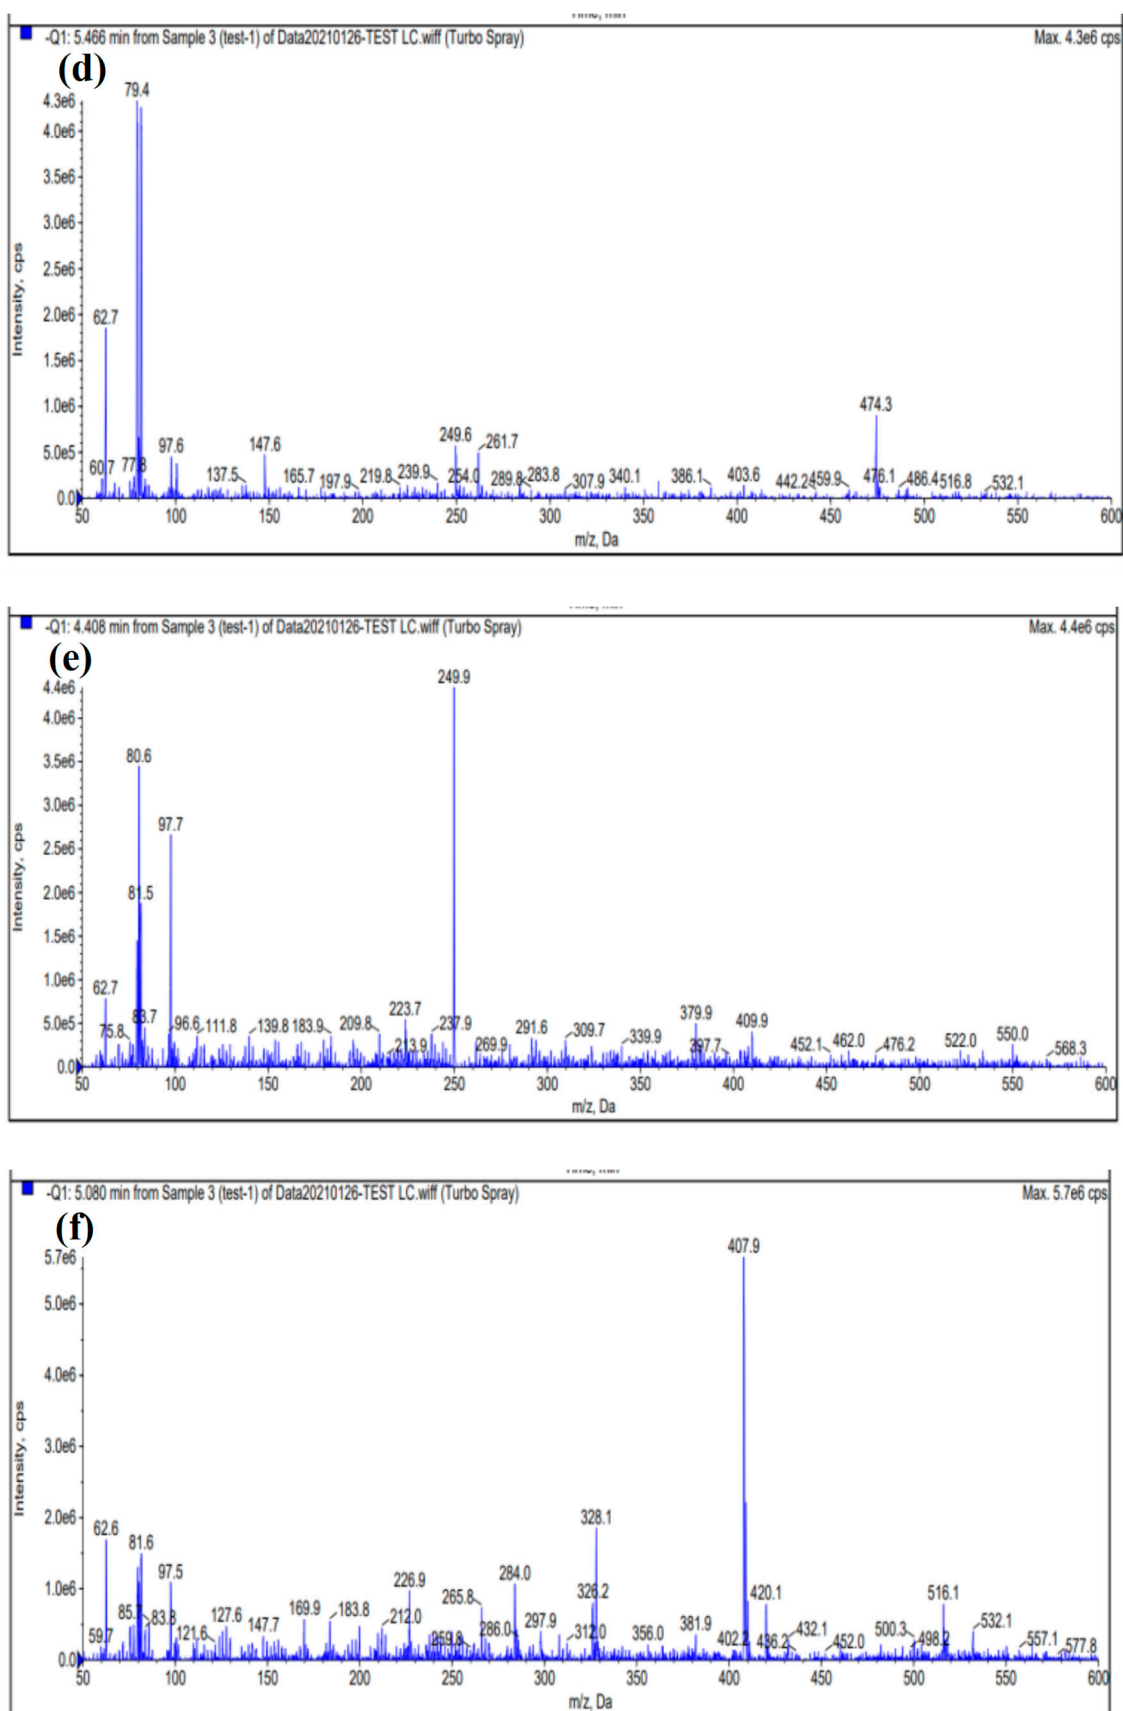

**Figure S11.** Corresponding mass spectra and structure of degradation products of TBBPA(The total mass spectra of degradation products (a) and each degradation product mass spectra (b,c,d,e,f)).

1. Wu, Y.W.; Chen, X.T.; Han, Y.; Yue, D.T.; Cao, X.D.; Zhao, Y.X.; Qian, X.F. Highly Efficient Utilization of Nano-Fe(0) Embedded in Mesoporous Carbon for Activation of Peroxydisulfate. *Environ. Sci. Technol.* **2019**, *53*, 9081–9090.
2. Liu, L.; Xu, X.; Li, Y.W.; Su, R.D.; Li, Q.; Zhou, W.Z.; Gao, B.Y.; Yue, Q. Y. One-step synthesis of “nuclear-shell” structure iron-carbon nanocomposite as a persulfate activator for bisphenol A degradation. *Chem. Eng. J.* **2020**, *382*, 122780.
3. Xiang, M.H.; Huang, M.F.; Li, H.; Wang, W.B.; Huang, Y.; Lu, Z.; Wang, C.; Si, R.F.; Cao, W. Nanoscale zero-valent iron/cobalt@mesoporous hydrated silica core-shell particles as a highly active heterogeneous Fenton catalyst for the degradation of tetrabromobisphenol A. *Chem. Eng. J.* **2021**, *417*, 129208.
4. Li, H.X.; Wan, J.Q.; Ma, Y.W.; Yan, W. Synthesis of novel core-shell Fe@Fe<sub>3</sub>O<sub>4</sub> as heterogeneous activator of persulfate for oxidation of dibutyl phthalate under neutral conditions. *Chem. Eng. J.* **2016**, *301*, 315–324.
5. Jonidi, J.A.; Kakavandi, B.; Jaafarzadeh, N.; Rezaei, K.R.; Ahmadi, M.; Akbar, B.A. Fenton-like catalytic oxidation of tetracycline by AC@Fe<sub>3</sub>O<sub>4</sub> as a heterogeneous persulfate activator: Adsorption and degradation studies. *Ind. Eng. Chem.* **2017**, *45*, 323–333.
